# Supplementary material for: The Canadian Cardiac Rehabilitation Registry: Inaugural Report on the Status of Cardiac Rehabilitation in Canada
Source: Rehabil Res Pract. 2015 Aug 18;2015:278979. doi: 10.1155/2015/278979 (PMC4556335; doi:10.1155/2015/278979)
Supplement: Supplementary file 1 — The Supplementary Material consists of the data dictionary 1.0 for the Canadian Cardiac Rehabilitation Registry. This is a listing of all variables assessed in the registry, with their definition (i.e., data sources, time windows, units of measurement). There are variables which are captured at cardiac rehabilitation intake assessment only, as well as variables which are assessed at both the intake and discharge assessments. [file 278979.f1.pdf]

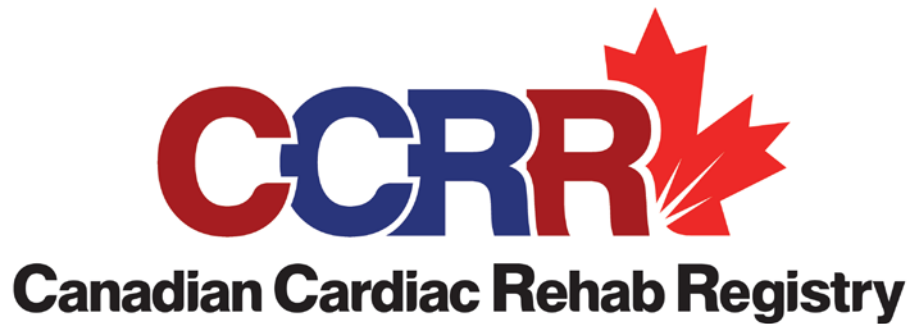

By: CACRC

# DATA ELEMENT DEFINITIONS

**May 2012**

Copyright © Canadian Association of Cardiac Rehabilitation 2012  
To be used with permission only. Not for re-distribution.

## Table of Contents

### **GENERAL SUMMARY**

|                           |    |
|---------------------------|----|
| Patient information       | 1  |
| ▪ Identifying information | 1  |
| ▪ Secondary information   | 1  |
| Cardiac Rehab Program     | 3  |
| Service Referrals         | 8  |
| Risk Factors              | 9  |
| <b>INTAKE/DISCHARGE 1</b> |    |
| Measurements              | 12 |
| Stress Test               | 16 |
| <b>INTAKE/DISCHARGE 2</b> |    |
| Occupation                | 20 |
| Smoking                   | 22 |
| Psycho-social             | 23 |
| <b>MEDICATIONS</b>        | 25 |
| Appendix A                | i  |

## GENERAL SUMMARY

### PATIENT INFORMATION

#### IDENTIFYING INFORMATION

##### Source Unique ID

This number is electronically generated, encrypted, and represents a unique identifier that indicates which clinical record this patient relates to.

##### Unique Patient ID

Enter the patient's permanent chart number ("patient ID number", "hospital number", "chart ID", "hospital ID") that corresponds to the patient's permanent unique file number. If you are unsure which is the permanent hospital file number ask a member of the Health Records Department staff which number is sent to the Canadian Institute of Health Information (CIHI). This is not a "visit" number. The CCRR automatically encrypts this number.

**Data Source:** Face sheet of the patient chart or on the Bradma plate stamped on the upper right corner of most pages of the chart.

**Data Entry:** The HID number is institution specific and ranges between 6 and 10 digits.

##### Year of Birth

Indicate the patient's year of birth.

##### Gender

Select the patient's sex.

**Data Entry:** Choices available are:

- Male
- Female
- Other

##### Consent Given

Confirm that patient consent was obtained for data collection and analysis.

**Data Entry:** Choices available are:

- Yes
- No

## SECONDARY INFORMATION

##### Ethnicity

Refers to the ethnic or cultural group (s) to which the patient and/or their ancestors belong. An ancestor is someone from whom a person is descended and is usually more distant than a grandparent. Ancestry should not be confused with citizenship or nationality. Ethnic or cultural origin refers to the ethnic "roots" of ancestral background of the population. If multiple ethnic origins are indicated, please only report the "**paternal ancestry**". Select only one from the list provided.

You may need to explain to the patient why this information is necessary. You may choose to say "**this information is collected to promote and ensure the equal opportunity for everyone to access cardiac rehabilitation services in Canada**". The

information generated will ensure that future patients in Canada will have equal access to services.

**Data Sources:** Patient intake assessment/interview.

**Data Entry:** Indicate only one of the ethnic origins listed (list of ethnic origins based on the 2001 Canadian Census data from Statistics Canada).

- Aboriginal
- Arab/West Asian (i.e. Armenian, Egyptian, Iranian, Lebanese, Moroccan, Afganistan)
- Black
- Chinese
- Filipino
- Japanese
- Korean
- Latin American
- South Asian (i.e. Pakistani, East Indian, Bangladesh, Sri Lankan)
- South East Asian (i.e. Cambodian, Indonesian, Loatian, Vietnamese)
- White/Caucasian
- Other
- Unknown

### **Marital Status**

Select the most appropriate response that corresponds with the patient's marital status.

**Data Source:** Face sheet of the patient chart, Admission history, History and Physical, Nursing Admission note, hospital information system, Intake Assessment

**Data Entry:** Choices available are:

- Single
- Married
- Divorced
- Widowed
- Common-Law Union
- Separated
- Unknown

### **Language Preference**

Refers to the patient's preference to communicate in one of Canada's two official languages (English or French).

**Data Entry:** Choices available are:

- English
- French

### **Education (Highest Level Achieved)**

Refers to the completion of secondary school or the highest level of university education achieved.

**Data Source:** Admission history, intake assessment for cardiac rehabilitation.

**Data Entry:**

- No High School – patient did not complete all high school requirements and no Secondary School Diploma was awarded (or equivalent).

- High School – patient completed high school and Secondary School Diploma was awarded (or equivalent).
- Bachelor Degree – patient completed an undergraduate program from University and Bachelors Degree was awarded.
- Post-graduate degree – patient completed advanced preparation (i.e. MD, Master’s degree, Ph.D., veterinary or dentistry).

### **Family Support**

Select the most appropriate response that corresponds with the patient’s living situation.

**Data Source:** Face sheet of the patient chart, Admission history, History and Physical, Nursing Admission note, hospital information system, Intake Assessment

**Data Entry:** Choices available are:

- Lives alone – patient is living alone.
- Lives with Spouse/Partner – patient is currently living with a spouse or partner (married or common-law)
- Lives with Friends/Family – patient is living with others that does not include a spouse or partner. This could include children, parents, in-laws.
- Unknown

### **Residence**

Select the most appropriate response to categorize the patient’s primary place of residence.

**Data Source:** Face sheet of the patient chart, Admission history, History and Physical, Nursing Admission note, hospital information system, Intake Assessment

**Data Entry:** Choices available are:

- Home/Apartment/Condominium
- Long-term Care Institution
- Rehabilitation Hospital
- Acute Care Hospital
- Unknown

### **Travel Time to Rehab**

Indicate the estimated time taken for a single one-way trip from the patient’s residence to the rehabilitation facility where the majority of the ongoing rehabilitation service will be provided. Travel time is independent of modality used.

**Data Source:** Cardiac rehabilitation intake interview/ assessment.

**Data Entry:** Choices available are:

- 0-30 minutes
- 31-45 minutes
- 46-60 minutes
- > 60 minutes
- Unknown

## **CARDIAC REHAB PROGRAM**

### **Referral Event(s)**

The referral event refers to the most recent event preceding the patient’s referral to cardiac rehabilitation. Referral events are considered only those events occurring within

the 2-year period prior to referral. The event does not necessarily require hospitalization.

There may be more than one possible referral event reported if the second referral event occurred within the same hospitalization period. The following are possible scenarios:

1. If the patient had coronary artery bypass graft surgery with an aortic valve replacement then both CABG and AVR would be considered referral events.
2. If the patient had a myocardial infarction and percutaneous transluminal coronary angioplasty within the same hospitalization period then both MI and PCI would be considered referral events.
3. If patient had an MI, was referred for cardiac rehabilitation and had another event during the period between referral and intake, the MI would count as the referral event and the secondary event (not within the same hospitalization period) would not be a referral event.

**Data Source:** Patient's chart, referral form, health professional referral letter, patient intake interview.

**Data Entry:** Choices available are:

- **Not Stable CAD / Angina**
- **Acute coronary syndrome (ACS) - Unspecified**
- **Acute coronary syndrome (ACS) - Myocardial infarction - Unspecified**
- **Acute coronary syndrome (ACS) - Myocardial infarction - STEMI**
- **Acute coronary syndrome (ACS) - Myocardial infarction - Non STEMI**
- **Acute coronary syndrome (ACS) - Unstable Angina**
- **Percutaneous Intervention (PCI) - Unspecified**
- **Percutaneous Intervention (PCI) - Drug Eluting Stent**
- **Percutaneous Intervention (PCI) - Bare Metal Stent**
- **Bypass Surgery (CABG)**
- **Valve Surgery - Unspecified**
- **Valve Surgery - Aortic**
- **Valve Surgery - Mitral**
- **Valve Surgery - Other**
- **Heart Failure - Unspecified**
- **Heart Failure - Cardiomyopathy**
- **Devices - Unspecified**
- **Devices - Pacemaker**
- **Devices - ICD**
- **Post Transplant**
- **Cerebral vascular disease - Unspecified**
- **Cerebral vascular disease - TIA**
- **Cerebral vascular disease - Stroke**
- **Peripheral Vascular disease**
- **High Risk Primary Prevention**
- **Unknown**

#### **Referral Event(s) Date(s)**

Enter the date(s) of the event(s). If there is more than one date as in scenario #2 above, enter a date for each event selected. However, the date corresponding to the most recent

referral event will be considered the Referral Event Date.

**Data Source:** Face sheet of the patient chart, hospital information system, nursing admission note, physician referral note, history and physical, or cardiac rehabilitation intake interview.

### **Referral Location**

Where did the referral come from?

**Data Source:** Patient's chart

**Data Entry:** Choices available are:

- In-patient unit
- Outpatient [diagnostic testing/ambulatory clinic/MD office]
- Emergency room
- Cardiac diagnostics / Intervention
- Physician office
- Outpatient clinic
- Other
- Unknown

### **Referral Date**

Enter the date the patient referral is made to the program (might not be the date the form is sent).

**Data Source:** Face sheet of the patient's chart, referral form at the CR program, others as indicated.

### **Referral Receipt Date**

Enter the date the patient referral is received by the program.

**Data Source:** Face sheet of the patient's chart, referral form at the CR program, date received stamped or fax date on referral form, others as indicated.

### **Automatic Referral**

Was this referral initiated automatically?

**Data Entry:** Choices available are:

- Yes
- No
- Unknown

### **Intake Visit Date**

Enter the date the patient attended the first appointment at the CR program (this may be the intake assessment, rehabilitation exercise test, educational class, or other services)

**Data Source:** Patient's chart.

### **Date the CR Program Began**

Enter the date the patient officially began the cardiac rehabilitation program. Please note that this applies to both on and off-site (home-based) cardiac rehabilitation programs.

**Date of CR Program Exit**

Date of the patient's CR exit assessment. This refers to the patient's final contact with a CR professional where reporting of the final assessment and education might occur.

Please note that it is possible for this to occur before or after the program discharge date.

**Discharge Date**

Indicate the date of discharge from the cardiac rehabilitation program. The discharge date could be based on the patient completing the CR month program, the patient completing all recommended services, or a date prior to completing the 6 month rehabilitation program due to specific reasons. This date should closely correspond to the patient's last documented rehabilitation visit.

**Data Source:** Patient's chart.

**Work Return Date**

Date that patient is actually able to return to work, if applicable.

**CR Program Completion**

Indicate if the patient completed the CR program.

**Interim Event(s)**

List any cardiac event(s) that occurred after referral to and prior to discharge from cardiac rehabilitation. Multiple post-referral events are possible.

**Data Source:** Patient's chart, physician progress note/assessment, nursing intake assessment note, hospitalization record(s), patient report (must follow-up with primary care physician to validate).

**Data Entry:** Choices available are:

- Stable CAD / Angina
- Acute coronary syndrome (ACS) – Unspecified
- Acute coronary syndrome (ACS) - Myocardial infarction – Unspecified
- Acute coronary syndrome (ACS) - Myocardial infarction – STEMI
- Acute coronary syndrome (ACS) - Myocardial infarction - Non STEMI
- Acute coronary syndrome (ACS) - Unstable Angina
- Percutaneous Intervention (PCI) – Unspecified
- Percutaneous Intervention (PCI) - Drug Eluting Stent
- Percutaneous Intervention (PCI) - Bare Metal Stent
- Bypass Surgery (CABG)
- Valve Surgery – Unspecified
- Valve Surgery – Aortic
- Valve Surgery – Mitral
- Valve Surgery – Other
- Heart Failure – Unspecified
- Heart Failure – Cardiomyopathy
- Devices – Unspecified
- Devices – Pacemaker
- Devices – ICD
- Post Transplant
- Cerebral vascular disease – Unspecified
- Cerebral vascular disease – TIA

- Cerebral vascular disease – Stroke
- Peripheral Vascular disease
- High Risk Primary Prevention
- Depression
- Death – Cardiac
- Death - Non Cardiac
- Unknown

**Interim Event(s) Date(s)**

Date(s) of cardiac event(s) occurring after referral to and prior to discharge from cardiac rehabilitation.

**Data Source:** Patient's chart, physician progress note/assessment, nursing intake assessment note, hospitalization record(s), patient report (must follow-up with primary care physician to validate).

**Premature Termination(s)**

Indicate the reason for premature termination of the patient's cardiac rehab program, if applicable

Data Entry: Choices available are:

- Lost to follow-up
- Patient choice (quit)
- Relocation
- Event – Cardiac
- Event – Other
- Death
- Unknown

**Premature Termination(s) Date**

If applicable, enter the date that patient prematurely terminated participation in the program.

**Nutritional Sessions Prescribed**

Enter the total number of nutritional counselling sessions scheduled for the patient's cardiac rehab program.

**Nutritional Sessions Completed**

Enter the total number of nutritional counselling sessions attended by the patient during their rehab program.

**Psychological Sessions Prescribed**

Enter the total number of psychological counselling sessions scheduled for the patient's cardiac rehab program.

**Psychological Sessions Completed**

Enter the total number of psychological counselling sessions attended by the patient during their rehab program.

**Smoking Cessation Sessions Prescribed**

Enter the total number of smoking cessation sessions scheduled for the patient's cardiac rehab program.

**Smoking Cessation Sessions Completed**

Enter the total number of smoking cessation sessions attended by the patient during their rehab program.

**Vocational Counselling Sessions Prescribed**

Enter the total number of vocational counselling sessions scheduled for the patient's cardiac rehab program.

**Vocational Counselling Sessions Completed**

Enter the total number of vocational counselling sessions attended by the patient during their rehab program.

**Number of Exercise Sessions Prescribed**

Enter the total number of exercise classes scheduled for the patient's cardiac rehab program.

**Number of Exercise Sessions Completed**

Enter the total number of exercise classes attended by the patient during their rehab program.

**SERVICE REFERRALS**

Information regarding the service referral data elements can most likely be found in the patient chart.

Except where stated otherwise, choices available for these data elements are as follows:

- **Offered and Accepted**
- **Offered and Declined**
- **Unknown**
- **Not Offered**

[N.B. If a patient does not accept or decline the offer please select 'Offered and Declined' .]

**On-site exercise training: once per week**

Was the patient offered or did they accept a once per week on-site exercise training program?

**On-site exercise training: twice per week**

Was the patient offered or did they accept a twice per week on-site exercise training program?

**On-site exercise training: three or more times per week**

Was the patient offered or did they accept a three or more times per week on-site exercise training program?

**Off-site exercise training: once per week**

Was the patient offered or did they accept a once per week off-site training program?

**Off-site exercise training: twice per week**

Was the patient offered or did they accept a twice per week off-site training program?

**Off-site exercise training: three or more times per week**

Was the patient offered or did they accept a three or more per week off-site training program?

**Nutrition 1:1 counsel**

Was the patient offered or did they accept one on one nutritional counselling?

**Smoking Cessation**

Was the patient offered or did they accept assistance to quit smoking within the CR program?

- If patient is a non-smoker, please select 'Not offered'

**Referral to Smoking Cessation Program**

Was the patient referred to a smoking cessation program outside of the CR program?

**Referral to Stress Management**

Was the patient referred to a stress management program?

**Referral to Depression Counselling**

Was the patient referred to a depression counselling program?

**Referral to Anxiety Counselling**

Was the patient referred to an anxiety counselling program?

## **RISK FACTORS**

**Sedentary Lifestyle**

According to the Canadian Association of Cardiac Rehabilitation physical inactivity (Sedentary Lifestyle) denotes a level of activity less than that needed to maintain good health. The minimum requirements for physical activity to maintain health, according to the 2009 CACR guidelines, is 30-60 minutes of moderate to vigorous physical activity most, preferably all, days of the week.

**Data Sources:** Initial intake visit, patient interview/questionnaire. Patient asked to describe their physical activity level prior to Cardiac Rehabilitation Intake.

**Data Entry:**

- **Yes** - if patient does not participate in moderate to vigorous physical activity for 30-60 minutes, most days of the week
- **No** - if patient participates in 30-60 minutes or more of moderate to vigorous exercise most days of the week
- **Unknown** - if the patient's physical activity cannot be determined by the sources defined or the reliability of the information is questionable.

## Hyperlipidemia

Is there a documented history of Hyperlipidemia?

**Data Source:** History & Physical, Emergency Department record/notes, Nursing Admission notes, Physician's progress notes, lab results (do not include blood work results within 8 weeks of an event e.g MI, CABG)

**Data Entry:**

- **Yes** - if there is a history of Hyperlipidemia, if patient is on lipid lowering medications and/or if LDL >2.0 mmol/L in patients with vascular disease (including CAD) or diabetes
- **No** - if there is no history of or treatment for Hyperlipidemia
- **Unknown** - if there is no mention of Hyperlipidemia in any of the recommended sources listed above.

## Hypertension

Is there a documented history of Hypertension (HTN)? Any of the following documented terms apply:

- Accelerated Blood Pressure
- Benign hypertension
- Elevated blood pressure (BP)
- High blood pressure (BP)
- Hypertension (HTN)
- Hypertensive heart disease
- Labile hypertension
- Renal hypertension
- Renovascular hypertension
- Systemic hypertension
- Systolic hypertension
- Uncontrolled hypertension

Those conditions that should **NOT** be considered hypertension are:

- Intraocular hypertension
- Portal hypertension
- Pulmonary hypertension (any)

**Data Source:** History & Physical, Emergency Department record/notes, Nursing Admission notes, Physician's progress notes, current treatment for hypertension.

**Data Entry:**

- **Yes** - if there is a history of Hypertension.
- **No** - if there is no history of Hypertension
- **Unknown** - if there is no mention of Hypertension in any of the recommended sources listed above.

## Smoking

**Note:** Smoking is defined as a minimum of 1 cigarette per day. The following should NOT be considered as 'smoking': Chewing tobacco, cigar smoking, marijuana, and pipe smoking.

Indicate if the patient has smoking as a risk factor.

### **Fam Hx of CAD**

Was there a family history of early onset coronary artery disease?

**Data Source:** History & Physical, Emergency Department record/notes, Nursing Admission notes, Physician's progress notes, patient intake assessment.

**Data Entry:** "Yes", "No" or "Unknown (default)".

- **Yes** - if there is a family history of coronary heart disease in a first degree relative (i.e. father, mother, brother or sister) with an early onset defined as mother/sister <65 years old and /or father/brother <55 years old in any of the recommended sources listed above.
- **No** - if there is a family history of coronary heart disease in a first degree relative (i.e. father, mother, brother or sister) but it has occurred outside of the age frames defined above.
- **No** - if there is no family history of coronary heart disease in a first-degree relative (i.e. father, mother, brother or sister).
- **Unknown** - if family history is not known

### **Diabetes**

Was there a documented diagnosis of diabetes or treatment for diabetes? Any of the following documented terms apply:

- Adult Onset Diabetes Mellitus
- Diabetes
- Diabetes Mellitus (DM)
- Diet controlled diabetes
- DM Type I (1) or Type II (2)
- Drug induced diabetes
- Juvenile Diabetes
- Non-insulin dependent Diabetes Mellitus
- Any treatment for diabetes

Those conditions that should **NOT** be considered as diabetes are:

- Diabetes insipidus
- History of gestational diabetes
- Impaired fasting glucose
- Glucose intolerance

**Data Source:** History & Physical, Emergency Department record/notes, Nursing Admission notes, Physician's progress notes, Intake Assessment, current treatment for diabetes.

**Data Entry:**

- **Yes** - if diabetes is mentioned in any of the recommended sources listed above.
- **No** - if there is no history of diabetes
- **Unknown** - if there is no mention of diabetes in any of the recommended sources listed above.

## Diabetes Type

If “Yes” is indicated above, enter:

- Type 1
- Type 2
- Unknown.

## INTAKE/DISCHARGE 1 MEASUREMENTS

The following measures are to be completed at program intake and discharge.

### CV STATUS

#### CCS Angina

Enter the corresponding Canadian Cardiovascular Society Angina Class at the time of intake and discharge. The CCS Angina Class must be determined post – referral event and should be assessed at the time of intake. If not assessed at intake and no post-event documentation is available, select Unknown from the pick list.

**Data Source:** Face sheet of the patient chart, Admission history, History and Physical, Nursing Admission note, Physician’s progress notes, hospital information system, Discharge summary or angiography or echocardiography test reports.

**Data Entry:** Choices available are:

- **0** – Asymptomatic
- **1** - Ordinary physical activity such as walking or climbing does not cause angina. Angina with strenuous, rapid or prolonged exertion at work or recreation.
- **2** - Slight limitation of ordinary activity. Walking or climbing stairs rapidly, walking uphill, walking or climbing stairs after meals or in cold or in wind, or under emotional stress or during the few hours after wakening. Walking more than 2 blocks on the level and climbing more than one flight of stairs at a normal pace and in normal conditions.
- **3** - Marked limitation of ordinary physical activity. Walking one or two blocks on the level or climbing one flight of stairs in normal conditions and at a normal pace.
- **4** - Inability to carry out any physical activity without discomfort; angina may be present at rest
- **Unknown**

#### NYHA class

Enter a value from I to IV as indicated at intake and discharge. The NYHA Functional Class needs to be determined post-referral event and should be assessed at the time of intake. If not assessed at intake and no post-event documentation is available, select Unknown from the pick list.

**Data Source:** Face sheet of the patient chart, Admission history, History and Physical, Nursing Admission note, Physician’s progress notes, hospital

information system, Discharge summary or angiography or echocardiography test reports.

**Data Entry:** Choices available are:

- **I** - Patients with cardiac disease but without resulting limitations of physical activity. Ordinary physical activity does not cause undue fatigue, palpitation, dyspnea, or anginal pain
- **II** - Patients with cardiac disease that results in a slight limitation of physical activity. Patients are comfortable at rest, but ordinary physical activity results in fatigue, palpitation, dyspnea, or anginal pain
- **III** - Patients with cardiac disease that results in a marked limitation of physical activity. Patients are comfortable at rest, but less than ordinary physical activity results in fatigue, palpitation, dyspnea, or anginal pain
- **IV** - Patients with cardiac disease that results in an inability to carry on any physical activity without discomfort; fatigue, dyspnea, or anginal pain may be present; if any physical activity is undertaken, symptoms increase. Symptoms may be present at rest.
- **Unknown**

#### **LV Function or LV Function Exact**

Enter the exact left ventricular ejection fraction (LVEF), if available.

#### **OR**

If exact LVEF unavailable, enter the appropriate value from the pick list provided to indicate the patients LVEF or degree of left ventricular function. LV Function to be assessed post-referral event and/or within 6 months of Intake. If there is no available documentation, select Unknown from the pick list.

**Data Source:** Physician notes: Admission history, History and Physical, Admission note, Physician's progress notes, Discharge summary, or referral note; Primary source documentation: angiography or echocardiography test reports.

**Data Entry:** Select only one of the following that corresponds to the patients level of left ventricular function.

- Normal  $\geq 50\%$  or greater
- Mild 40% and 49%
- Moderate 30% and 39%
- Severe  $<30\%$
- Unknown

### **BIOCHEMISTRY**

#### **General Notes:**

1. Blood work must be done under standard fasting conditions (9- 12 hours since last meal (Canadian Lipid Guidelines, 2006).
2. **Intake Values** - Values obtained within 1 month prior to and two weeks after intake are valid. Note that lipid results within 8 weeks of a cardiac event must be repeated to be valid. Blood work can be done on site or at a local lab. The CR program or referring physician can complete the requisition; whichever is the local practice.
3. **Discharge Values** – Values obtained within 1 month of discharge are valid.

## **Blood Sugar Profile**

### **FBS (mmol/L)**

This refers to the patients fasting blood glucose level.

**Data Source:** (1) Lab Report, (2) Emergency Department record/notes, (3) History & Physical, (4) Progress note.

**Data Entry:**

Enter in the space provided the value obtained for fasting glucose.

### **HbA1c (pct)**

This refers to the patient's glycosylated hemoglobin level.

**Data Source:** (1) Lab Report, (2) Emergency Department record/notes, (3) History & Physical, (4) Progress note.

**Data Entry:**

Enter in the space provided the value obtained for glycosylated hemoglobin. This value should be entered as a decimal. For example, an HbA1c of 6% should be entered as 0.06.

## **Lipid Profile (mmol/L)**

### **Total Cholesterol (TC) (mmol/L)**

What was the patient's total cholesterol value.

**Data Source:** (1) Lab Report, (2) Emergency Department record/notes, (3) History & Physical, (4) Progress note.

**Data Entry:** Enter the value for total cholesterol in mmol/L

### **Triglycerides (TG) (mmol/L)**

What was the serum triglycerides (TG) result?

**Data Source:** (1) Lab Report, (2) Progress note.

**Data Entry:** Enter value obtained for serum Triglycerides in mmol/L.

### **High Density Lipoprotein (HDL) (mmol/L)**

What was the HDL cholesterol result?

**Data Source:** (1) Lab Report, (2) Progress note.

**Data Entry:** Enter value obtained for HDL cholesterol (HDL) in mmol/L.

### **Low Density Lipoprotein (LDL) (mmol/L)**

What was the LDL cholesterol result?

**Data Source:** (1) Lab Report, (2) Progress note.

**Data Entry:** Enter value obtained for LDL cholesterol (LDL) in mmol/L.

### **TCHDL**

What was the TC/HDL ratio?

**Data Source:** (1) Lab Report; (2) Progress note.

**Data Entry:** Enter value obtained from Total cholesterol / HDL ratio.

## **Other Biochemistry Results**

### **Serum Creatinine**

What was the serum creatinine result?

**Data Source:** (1) Lab Report, (2) Progress note.

**Data Entry:** Enter value obtained for serum creatinine in  $\mu\text{mol/L}$ .

#### **Microalbuminuria**

What was the microalbuminuria result?

**Data Source:** (1) Lab Report, (2) Progress note.

**Data Entry:** Enter value obtained from microalbuminuria test in mg/day

#### **hs-CRP**

What was the high-sensitivity C-reactive protein (hs-CRP) result?

**Data Source:** (1) Lab Report, (2) Progress note.

**Data Entry:** Enter value obtained from hs-CRP test in mg/L.

### **ANTHROPOMETRIC**

#### **Weight (KG)**

Enter the patient's weight in kilograms.

**Data Source:** Direct measurement at the intake assessment.

**Data entry:** Enter the patient's weight to the nearest 10<sup>th</sup> of a kilogram (i.e. 78.0 kg).

#### **Height (m)**

Enter the patient's height in metres at the initial intake visit.

**Data Source:** Direct measurement at the intake assessment visit.

**Data Entry:** Enter the patient's height to the nearest cm. The number you enter will be three digits (e.g. 1.72).

#### **Waist (cm)**

Enter the patient's waist measurement in centimeters (cm).

**Data Source:** Direct measurement at the intake assessment.

**Data entry:** Enter value obtained from patient's waist measurement to the nearest centimeter.

#### **HIP (cm)**

Enter the patient's hip measurement in centimeters (cm).

**Data Source:** Direct measurement at the intake assessment.

**Data entry:** Enter value obtained from patient's hip measurement to the nearest centimeter.

### **HEMODYNAMIC**

#### **2009 Canadian Hypertension Education Program Recommended Technique for Measuring Blood Pressure**

([http://hypertension.ca/chep/wp-content/uploads/2009/01/2009-chep-recommendations\\_d3.pdf](http://hypertension.ca/chep/wp-content/uploads/2009/01/2009-chep-recommendations_d3.pdf))

Place the cuff so that the lower edge is 3 cm above the elbow crease and the bladder is centered over the brachial artery. **The patient should be resting comfortably for 5 minutes in the seated position with back support.** The arm should be bare and supported with the antecubital fossa at heart level, as a lower position will result in an erroneously higher SBP and DBP. **There should be no talking, and patients' legs should not be crossed.** **At least three measurements should be taken in the same arm with the patient in the same position. The first reading should be discarded and the latter two averaged.**

**Systolic Blood Pressure / Diastolic Blood Pressure (SBP / DBP) (mm)**

Enter the patient's systolic blood pressure (mmHg) and the patient's diastolic blood pressure (mmHg).

**Data Source:** Direct measurement at the intake assessment.

**Data entry:** Enter value obtained from patient's SBP and DBP.

**Pulse Rate (bpm)**

Enter the patient's heart rate (bpm).

**Data Source:** Direct measurement at the intake assessment.

**Data entry:** Enter value obtained from patient's pulse measurement.

**STRESS TEST DATA**

The following measures are required at program intake and discharge.

**NOTE**

A standardized protocol such as the Ramp, Bruce or Modified Bruce is highly recommended. In the rare circumstance that a patient refuses to complete a stress test, a previously completed symptom-limited maximal stress test will be acceptable, providing it meets the following criteria:

- A symptom-limited maximal stress test using standardized protocol;
- Stress test completed (1) post-referral event and within 1 month of the intake date, and (2) post-discharge and the patient has been stabilized in the period following the test;

**Stress Test Location**

Where was the stress test performed?

**Data Entry:** Choices available are:

- On Site – by CR Team
- Off Site – by other MD
- Unknown

**Stress Test Date**

When was the stress test performed?

**Data Entry:** Please use the calendar to enter the date of the exercise stress test.

**Resting SBP (mm)**

What was the patient's resting systolic blood pressure during the exercise stress test?

**Data Source:** Exercise stress test reports.

**Data Entry:**

- If two BPs were recorded for the same time or it was taken in both arms enter the **highest systolic reading**.
- If a range is given, record the mid-value i.e. 120-130 record 125.
- If the systolic BP is "0" in the chart enter "0".

**Peak SBP (mm)**

What was the patient's peak systolic blood pressure during the exercise stress test?

**Data Source:** Exercise stress test reports.

**Data Entry:**

- If two BPs were recorded for the same time or it was taken in both arms enter the **highest systolic reading**.
- If a range is given, record the mid-value i.e. 120-130 record 125
- If the systolic BP is “0” in the chart enter “0”.

### **Resting DBP (mm)**

What was the patient's resting diastolic blood pressure during the exercise stress test?

**Data Source:** Exercise stress test report.

**Data Entry:**

- If two BPs were recorded for the same time and have the same diastolic BP record the one with the highest diastolic value.
- If a range is given, record the mid-value i.e. 60 – 70 record 65.
- If the first diastolic BP is recorded in the chart as “p” for palpitation find the next BP with both systolic and diastolic values recorded numerically.

### **Peak DBP (mm)**

What was the patient's peak diastolic blood pressure during the exercise stress test?

**Data Source:** Exercise stress test report.

**Data Entry:**

- If two BPs were recorded for the same time and have the same diastolic BP record the one with the highest diastolic value.
- If a range is given, record the mid-value i.e. 60 – 70 record 65.
- If the first diastolic BP is recorded in the chart as “p” for palpitation find the next BP with both systolic and diastolic values recorded numerically.

### **Resting Heart Rate (HR)**

What was the patient's resting heart rate during the exercise stress test?

**Data Source:** Exercise stress test report.

**Data Entry:**

- Enter the resting heart rate (beats per minute) recorded on the electrocardiogram during the exercise test. In the event that the HR is not accurate on the cardiogram, a palpated HR (apical or radial) may be used.

### **Peak Heart Rate (HR)**

What was the patient's peak heart rate during the exercise stress test?

**Data Source:** Exercise stress test report.

**Data Entry:**

- Enter the peak heart rate (beats per minute) recorded on the electrocardiogram during the exercise test. In the event that the HR is not accurate on the cardiogram, a palpated HR (apical or radial) may be used.

## **GXT Protocol**

What was the GXT protocol used for the exercise stress test?

**Data Source:** Exercise stress test report.

**Data Entry:** Choice available are:

- Athletic
- Balke
- Bruce
- Bruce-Modified
- Ramp (includes slow, regular, fast)
- Cycle
- 6 min walk
- Ramp
- Naughton
- Other
- Unknown

## **Exercise Time**

What was the duration of exercise during the exercise stress test?

**Data Source:** Exercise stress test report.

**Data Entry:** Enter the duration of exercise in minutes. For example, a duration of 14 minutes and 30 seconds would be entered as 14.5.

## **Reason for Premature Termination**

If the exercise stress test was terminated, provide the reason why.

**Data Source:** Exercise stress test report.

**Data Entry:** Choices available are:

- Fatigue/leg pain
- Dyspnea
- Angina
- ST changes
- Arrhythmias
- Drop in BP
- Hypertensive response
- Presyncopal
- Patient request
- Equipment problems
- MD instruction
- Other
- Unknown

## **Angina**

Indicate if patient had documented angina during the exercise stress test.

**Data Source:** Exercise stress test report and or exercise test ECG

**Data Entry:** Choices available are:

- None
- Non-limiting
- Stopped Test

- Not documented
- Unknown

### Borg 10 Scale

If the Borg 10 Scale was used, enter the maximum Borg rating achieved at completion of the exercise stress test. The Borg rating is used to assess perceived level of exertion.

**Data Source:** Exercise stress test report.

**Data Entry:**

- Value from 0-10

| 10-Grade Scale |                   |
|----------------|-------------------|
| 0              | Nothing           |
| 0.5            | Very, very weak   |
| 1              | Very weak         |
| 2              | Weak (light)      |
| 3              | Moderate          |
| 4              | Somewhat strong   |
| 5              | Strong (heavy)    |
| 6              |                   |
| 7              | Very strong       |
| 8              |                   |
| 9              |                   |
| 10             | Very, very strong |

### Borg 15 Scale

If the Borg 10 Scale was used, enter the maximum Borg rating achieved at completion of the exercise stress test. The Borg rating is used to assess perceived level of exertion.

**Data Source:** Exercise stress test report.

**Data Entry:**

- Value from 6-20

| 15-Grade scale |                  |
|----------------|------------------|
| 6              |                  |
| 7              | Very, very light |
| 8              |                  |
| 9              | Very light       |
| 10             |                  |
| 11             | Fairly light     |
| 12             |                  |
| 13             | Somewhat hard    |
| 14             |                  |
| 15             | Hard             |
| 16             |                  |
| 17             | Very hard        |
| 18             |                  |
| 19             | Very, very hard  |
| 20             |                  |

### Max ST Depression

Indicate the maximum level of ST segment depression. ST depression is defined as horizontal or down-sloping ST depression measured at 60 or 80ms after the J point.

**Data Source:** Physician interpretation on the exercise stress test report and/or exercise test ECG.

**Data Entry:** None or write in number of millimeters noted on the test.

### Peak METs

Indicate the peak METs achieved during the test in the space provided. The METs can be estimated from standard equations using speed and grade, or can be calculated from the direct measurement of oxygen consumption using gas analysis.

**Data Source:** Exercise stress test report.

**Data Entry:** Enter the numeric value of the peak METs as indicated by the exercise stress test report to the nearest 1/10 of a MET (i.e. 5.4 METs).

### Duke Treadmill Score

What was the Duke Treadmill Score (DTS)? The DTS is a weighted index combining ST segment deviation (depression or elevation), treadmill time and exercise-induced angina. It provides accurate diagnostic and prognostic information.

**DTS = Exercise Time (regular Bruce protocol minutes)\* – (5x ST deviation) – (4x Angina index)**

Angina Index: 0=none, 1=during test, and 2=angina stopped test. Distinction between exercise-induced angina and non-anginal chest pain is based on the clinical judgement of the physician supervising the stress test. Emphasis is placed on reproducing the patient's usual presenting symptoms and the classic features of typical angina.

**Data Source:** Exercise stress test report

**Data Entry:** Enter value between –25 (highest risk) and +15 (lowest risk)

\*Can be “back-calculated” from non-Bruce protocols solving for METs.

### METs Directly Measured

Indicate if METs level was directly measured using gas analysis or estimated.

**Data Source:** Exercise stress test report.

**Data Entry:**

- **Yes** - if METs were directly measured by oxygen uptake
- **No** - if METs were estimated using standard equations from final workload level completed.

## INTAKE/DISCHARGE 2 OCCUPATION

The following measures are recommended at program intake and discharge.

### Occupation

Select the most appropriate response to describe the patient's most recent occupation prior to the intake appointment and at discharge from cardiac rehabilitation. The Occupation Types are the Porter-Pineo McRobert's classification based on the 1981

Canadian Classification and Dictionary of Operations and can be assigned Socioeconomic Status using the Blishen Method.

**Data Source:** Admission history, History and Physical, Consultant's notes, Nursing Admission note, Intake Assessment.

**Data Entry:** Available choices are:

- **Self-Employed Professional** - patient is currently self-employed.
- **Semiskilled Manual**
- **Employed professional** - patient is currently employed outside of the home as a professional (ie. MD, PhD)
- **Foreman**
- **Skilled Clerical/Sales/Services**
- **Farm worker**
- **High-Level Manager** if the patient is currently employed in a managerial position.
- **Skilled Blue Collar**
- **Semiskilled Clerical/Sales/Services**
- **Farmer (owner)**
- **Semi-professional**
- **Technician**
- **Unskilled Clerical/Sales/Services**
- **Unskilled manual**
- **Middle-level manager**
- **Supervisor**
- **Homemaker** - patient is functioning as a homemaker in his or her home.
- **Not applicable**
- **Unknown**

### Employment Status

Select the most appropriate response to describe the patient's employment status at the time of intake to and discharge from cardiac rehabilitation.

**Data Source:** Admission history, History and Physical, Consultant's notes, Nursing Admission note, Intake Assessment.

**Data Entry:** Available choices are:

- **Full-time** - patient is currently employed or self-employed outside the home (35 or greater hours per week).
- **Part-time** - patient is currently employed less than full-time outside the home (less than 35 hours per week).
- **Unemployed** - patient is temporarily laid off or unemployed and looking for work.
- **Retired** - patient is no longer working and not looking for employment.
- **Not/Never Employed Outside the Home** - patient is not working outside the home and is not looking for employment.
- **Short-term Disability** - patient is not currently working due to his/her illness and is expected to return to work in the near future.
- **Long-term Disability** - patient is not currently working due to his/her illness and is not expected to return to work in the near future.

- **Employed - Permanent Restrictions** - patient is currently employed and defined as restricted duties due to the severity of his/her illness.
- **Employed – Modified Duties** – patient is currently employed and defined as modified duties due to the severity of his/her illness
- **Unknown**

### **Desired Occupation Status**

Select the most appropriate response to describe the patient's desired occupation status prior to the intake appointment and at discharge from cardiac rehabilitation.

**Data Source:** Admission history, History and Physical, Consultant's notes, Nursing Admission note, Intake Assessment.

**Data Entry:** See list provided under 'Occupation'

### **Desired Occupation Status Achieved**

Was the patient's desired occupational status achieved by discharge from cardiac rehabilitation?

**Data Source:** Discharge assessment/interview, patient's chart.

**Data Entry:** Indicate:

- **Yes** - patient achieved his/her desired occupation status by discharge
- **No** - patient did not achieve his/her desired occupation status by discharge

## **SMOKING**

The following measures are recommended at program intake and discharge.

**Note: Smoking is defined as a minimum of 1 cigarette per day. The following should NOT be considered as 'smoking': Chewing tobacco, cigar smoking, marijuana, and pipe smoking.**

### **At the present time, do you smoke cigarettes?**

Does the patient smoke at the present time (intake and discharge)?

**Data Entry:** Choices available are:

- Every Day
- Occasionally
- Not at all
- Unknown

### **When was the last time you smoked at all, even just one puff?**

If patient is or was a smoker, indicate the last date that the patient smoked. **If conflicting information is documented, take the "worst" case.**

**Data Source:** History & Physical, Nursing Admission notes, Physician's progress notes, Intake Assessment.

### **Have you ever smoked cigarettes daily?**

Indicate if the patient ever smoked cigarettes daily.

**Data Entry:** Choices available are:

- Yes
- No

**At what age did you begin to smoke cigarettes every day?**

Indicate the age that the patient began to smoke cigarettes daily.

**On those days you smoked, how many cigarettes did you usually smoke?**

Indicate the number of cigarettes smoked per day.

**CO Level (if available)**

If available, indicate the CO level (0-200 ppm).

**CO Level Measuring Device**

Indicate the device used to measure CO level.

**Data Entry:** Type in the name of the device.

**NOTE:** If you click, “Copy Intake Values to Discharge”, the exact same information will populate the Discharge smoking data. This is useful for smoking data that does not change from intake to discharge from the CR program.

**PSYCHO-SOCIAL**

The following measures are recommended at program intake and discharge.

**ANXIETY****Measure Performed**

Was an anxiety measure performed?

**Data Entry:** Choices available are:

- Yes
- No

**Score**

What was the score of the anxiety measure?

**Data Entry:** Enter the numerical value.

**At or above cutoff**

Was this score at or above the cutoff for anxiety?

**Data Entry:** Choices available are:

- Yes
- No

**Measure**

What tool was used to measure anxiety?

**Data Entry:** Choices available are:

- **Anxiety & Depression Scale Anxiety Score (HADS-A)**
- **Beck Anxiety Inventory (BAI)**
- **Other, please specify**

**Other measure**

If “Other, please specify” was chosen above, please type the name of the measure in here.

**DEPRESSION****Measure Performed**

Was a depression measure performed?

Copyright © Canadian Association of Cardiac Rehabilitation 2012

To be used with permission only. Not for re-distribution

**Data Entry:** Choices available are:

- Yes
- No

**Measure Score**

What was the score of the depression measure?

**Data Entry:** Enter the numerical value.

**At or above cutoff**

Was this score at or above the cutoff for depression?

**Data Entry:** Choices available are:

- Yes
- No

**Measure**

What tool was used to measure depression?

**Data Entry:** Choices available are:

- **Anxiety & Depression Scale Depression Score (HADS-D)**
- **Beck Depression Inventory (BDI)**
- **Other, please specify**

**Other measure**

If “Other, please specify” was chosen above, please type the name of the measure in here.

***QUALITY OF LIFE – PHYSICAL***

**Measure Performed**

Was a physical QOL measure performed?

**Data Entry:** Choices available are:

- Yes
- No

**Score**

What was the score of the physical QOL measure?

**Data Entry:** Enter the numerical value.

**Measure**

What tool was used to measure physical QOL?

**Data Entry:** Choices available are:

- **SF-12**
- **SF-36**
- **Other, please specify**

**Other measure**

If “Other, please specify” was chosen above, please type the name of the measure in here.

***QUALITY OF LIFE – MENTAL***

**Mental Performed**

Was a mental QOL measure performed?

**Data Entry:** Choices available are:

- Yes
- No

**Score**

What was the score of the mental QOL measure?

**Data Entry:** Enter the numerical value.

**Measure**

What tool was used to measure mental QOL?

**Data Entry:** Choices available are the same as for QOL - physical

**Other measure**

If “Other, please specify” was chosen above, please type the name of the measure in here.

**QUALITY OF LIFE – OTHER**

**Measure Performed**

Was another QOL measure performed?

**Data Entry:** Choices available are:

- Yes
- No

**Score**

What was the score of the other QOL measure?

**Data Entry:** Enter the numerical value.

**Measure**

What tool was used to measure other QOL?

**Data Entry:** Choices available are the same as for QOL - physical

**Other measure**

If “Other, please specify” was chosen above, please type the name of the measure in here.

**MEDICATIONS**

Enter all prescribed **cardiovascular-related** medications at intake and discharge from the CR program. Discharge medications could be those documented at the time of the exit **Stress Test** or during the **Exit Assessment**.

**Class**

Indicate the therapeutic class of the medication(s) noted above.

**Data Entry:** Please see Appendix A for the list of medications and therapeutic classes.

**Name**

Choose the generic and brand name of all cardiovascular-related medications the patient is prescribed at intake and discharge.

**Data Entry:** Please see Appendix A for the list of medications and therapeutic classes.

**Contraindicated**

Is this medication contraindicated?

**Data Entry:** Choices available are:

- Yes
- No

**Dose, units**

- Indicate the doses of all noted medications.

**Data Entry:** Enter numeric value.

- Indicate the medication unit(s) of the dose(s).

**Data Entry:** Choices available are:

- **Unknown**
- **mg**
- **ug**
- **g**
- **U**
- **mL**
- **mg/hr**
- **packet**
- **mg/day**
- **ug/day**

### Frequency

- Indicate the frequency that the patient was prescribed to take the medication(s).

**Data Entry:** Enter the number of times per day that patient was prescribed to take the medication(s).

- Indicate the medication schedule (frequency and/or time of day).

**Data Entry:** Choices available are:

- **Unknown**
- **od**
- **qam**
- **ac breakfast**
- **ac lunch**
- **qpm**
- **ac dinner**
- **qhs**
- **bid**
- **tid**
- **qid**
- **tid on a qid schedule**
- **on in am, off at bedtime**
- **q 5min x 3 prn**
- **od prn**
- **as needed (max 20 pieces/day)**
- **as needed (max 80 sprays/day)**
- **as needed (6-16 cartridges/day)**
- **q4h prn**

**NOTE:** By clicking “»” next to each medication on the Medication home screen, the exact same information will populate the Discharge medication list. This is useful for medications and dosages that do not change from intake to discharge from the CR program.

## APPENDIX A

| TherapeuticClass                                | Generic                                  | Brand          |
|-------------------------------------------------|------------------------------------------|----------------|
| <b>analgesic combinations</b>                   | acetaminophen-tramadol 37.5 mg           | Tramacet       |
| analgesic combinations                          | acetylsalicylic acid-butalbital-caffeine | Tecnal         |
| <b>angiotensin converting enzyme inhibitors</b> | benazepril                               | Lotensin       |
| angiotensin converting enzyme inhibitors        | captopril                                | captopril      |
| angiotensin converting enzyme inhibitors        | captopril                                | Novo-Captopril |
| angiotensin converting enzyme inhibitors        | captopril                                | Apo-Capto      |
| angiotensin converting enzyme inhibitors        | cilazapril                               | Inhibace       |
| angiotensin converting enzyme inhibitors        | enalapril                                | enalapril      |
| angiotensin converting enzyme inhibitors        | enalapril                                | Apo-Enalapril  |
| angiotensin converting enzyme inhibitors        | enalapril                                | Vasotec        |
| angiotensin converting enzyme inhibitors        | enalaprilat                              | Vasotec        |
| angiotensin converting enzyme inhibitors        | fosinopril                               | Monopril       |
| angiotensin converting enzyme inhibitors        | lisinopril                               | Zestril        |
| angiotensin converting enzyme inhibitors        | perindopril                              | Coversyl       |
| angiotensin converting enzyme inhibitors        | quinapril                                | Accupril       |
| angiotensin converting enzyme inhibitors        | ramipril                                 | Altace         |
| angiotensin converting enzyme inhibitors        | trandolapril                             | Mavik          |

**angiotensin II inhibitors**

angiotensin II inhibitors

**anorectal preparations**

anorectal preparations

anorectal preparations

anorectal preparations

anorectal preparations

anorectal preparations

anorectal preparations

**antiadrenergic agents, centrally acting**

antiadrenergic agents, centrally acting

**antiadrenergic agents, peripherally acting**

antiadrenergic agents, peripherally acting

antiadrenergic agents, peripherally acting

antiadrenergic agents, peripherally acting

candesartan study

candesartan

candesartan or placebo study

eprosartan

irbesartan

losartan study

losartan

losartan

telmisartan

valsartan

hydrocortisone 1%-pramoxine 1%

hydrocortisone 1%-pramoxine 1%

zinc sulfate 0.5%

zinc sulfate 0.5%-pramoxine 1%

zinc sulfate-pramoxine

zinc sulfate-hydrocortisone-pramoxine

zinc sulfate-hydrocortisone-pramoxine

clonidine

clonidine

clonidine

clonidine or placebo study

clonidine transdermal or placebo study

methyldopa

methyldopa

alfuzosin ER

doxazosin

prazosin

reserpine

DC-AHS-0006

Atacand

DC-AHS-0006

Teveten

Avapro

-

losartan

Cozaar

Micardis

Diovan

Pramox HC

Proctofoam HC

Anusol Ointment

Anusol Plus

Anusol Plus

Sab Anuzinc HC Plus

Proctodan HC

Dixarit

Novo-Clonidine

clonidine

clonidine or placebo

clonidine or placebo

Apo-Methyldopa

methyldopa

Xatral

Cardura

Novo-Prazin

Novo-Reserpine

antiadrenergic agents, peripherally acting  
 antiadrenergic agents, peripherally acting  
 antiadrenergic agents, peripherally acting

### **antianginal agents**

antianginal agents  
 antianginal agents

### **antiarrhythmic agents**

antiarrhythmic agents  
 antiarrhythmic agents

tamsulosin CR

tamsulosin SR

terazosin

amyl nitrite

isosorbide dinitrate

isosorbide dinitrate SR

isosorbide dinitrate SL

isosorbide mononitrate ER

nitroglycerin

nitroglycerin

nitroglycerin (0.4 mg/spray)

nitroglycerin 2%

nitroglycerin

adenosine

amiodarone

bretylium

disopyramide

disopyramide

disopyramide ER

disopyramide

dofetilide

flecainide

flecainide

GAP-486 or placebo study

ibutilide

lidocaine 0.5%

lidocaine 1%

lidocaine 1%

lidocaine 1.5%-epinephrine 1:200000

lidocaine

Flomax CR

Flomax

Apo-Terazosin

Amyl Nitrite

Novo-Sorbide

Cedocard-SR

Apo-ISDN

Imdur

Nitro-Dur

Minitran

Nitrolingual

Nitrol

Nitroglycerin

Adenocard

Cordarone

Bretylium Tosylate

disopyramide

Rythmodan

Norpace CR

Rythmodan-LA

Tikasyn

Tambocor

flecainide

GAP-486 or placebo study

Corvert

Xylocaine HCl

Xylocaine HCl

Lidocaine Hydrochloride

Xylocaine HCl with Epinephrine

Xylocard

iv

calcium channel blocking agents  
 calcium channel blocking agents

**cardioselective beta blockers**

cardioselective beta blockers  
 cardioselective beta blockers

**cox-2 inhibitors**

cox-2 inhibitors

**fibric acid derivatives**

fibric acid derivatives  
 fibric acid derivatives

NIFEdipine  
 NIFEdipine PA  
 NIFEdipine ER  
 nimodipine  
 verapamil SR  
 verapamil  
 verapamil ER  
 verapamil  
 verapamil  
 verapamil  
 acebutolol  
 atenolol  
 atenolol  
 atenolol  
 bisoprolol  
 esmolol  
 esmolol  
 metoprolol  
 metoprolol SR  
 metoprolol  
 metoprolol  
 metoprolol  
 metoprolol  
 metoprolol  
 celecoxib  
 meloxicam  
 bezafibrate  
 bezafibrate SR  
 clofibrate  
 fenofibrate  
 fenofibrate MC  
 fenofibrate MCR  
 fenofibrate MCR

PMS NIFEdipine  
 Apo-Nifed PA  
 Adalat XL  
 Nimotop  
 Isoptin SR  
 Gen-Verapamil  
 Chronovera  
 Verapamil Hydrochloride  
 verapamil  
 Novo-Veramil  
 Monitan  
 Novo-Atenol  
 PMS-Atenolol  
 atenolol  
 Monacor  
 Brevibloc  
 esmolol 2500 mg/250 mL  
 metoprolol  
 Lopresor SR  
 Apo-Metoprolol  
 PMS-Metoprolol-L  
 Betaloc  
 Novo-Metoprol Uncoated  
 Celebrex  
 Mobicox  
 Bezalip  
 Bezalip  
 Novo-Fibrate  
 Apo-Fenofibrate  
 Lipidil Supra  
 Gen-Fenofibrate Micro  
 Apo-Feno-Micro

fibric acid derivatives

**herbal products**

**HMG-CoA reductase inhibitors**

HMG-CoA reductase inhibitors

**impotence agents**

impotence agents

**inotropic agents**

inotropic agents

inotropic agents

inotropic agents

inotropic agents

inotropic agents

**loop diuretics**

loop diuretics

loop diuretics

loop diuretics

loop diuretics

loop diuretics

**miscellaneous antihyperlipidemic agents**

**non-cardioselective beta blockers**

non-cardioselective beta blockers

gemfibrozil

ubiquinone

atorvastatin

fluvastatin

lovastatin

pravastatin

rosuvastatin

rosuvastatin or placebo study

simvastatin

simvastatin

alprostadil

sildenafil

digoxin

DOBUtamine

DOPamine

DOPamine

milrinone

milrinone or placebo study

bumetanide

ethacrynic acid

ethacrynic acid

furosemide

furosemide

furosemide

ezetimibe

carvedilol

labetalol

labetalol

labetalol

nadolol

nadolol

oxprenolol

PMS Gemfibrozil

Coenzyme Co Q10

Lipitor

Lescol

Apo-Lovastatin

Pravachol

Crestor

Aurora

Zocor

Apo-Simvastatin

Prostin Vr Sterile

Viagra

Lanoxin

Dobutamine Hydrochloride

Intropin

Dopamine HCl In Dextrose

Primacor

milrinone

Burinex

Edecrin

Sodium Edecrin

Apo-Furosemide

Lasix

Furosemide

Ezetrol

Coreg

Apo-Labetalol

Trandate

labetalol

nadolol

Apo-Nadol

Trasicor

non-cardioselective beta blockers  
 non-cardioselective beta blockers

**platelet aggregation inhibitors**

platelet aggregation inhibitors  
 platelet aggregation inhibitors

**potassium-sparing diuretics**

potassium-sparing diuretics  
 potassium-sparing diuretics  
 potassium-sparing diuretics

**salicylates**

salicylates  
 salicylates  
 salicylates  
 salicylates  
 salicylates  
 salicylates

**SSRI antidepressants**

oxprenolol SR  
 pindolol  
 propranolol  
 propranolol  
 propranolol  
 propranolol LA  
 sotalol  
 sotalol  
 timolol

AZD6140 or placebo study  
 clopidogrel  
 clopidogrel or placebo study  
 clopidogrel or placebo study  
 clopidogrel or placebo study  
 CS 747 or clopidogrel study  
 dipyridamole  
 dipyridamole  
 dipyridamole  
 dipyridamole  
 ticlopidine  
 amiloride  
 amiloride  
 spironolactone  
 spironolactone  
 acetylsalicylic acid  
 acetylsalicylic acid EC  
 acetylsalicylic acid  
 acetylsalicylic acid CHEW  
 acetylsalicylic acid EC  
 acetylsalicylic acid EC  
 diflunisal  
 citalopram

Slow Trasicor  
 Novo-Pindol  
 Inderal  
 propranolol  
 Novo-Pranol  
 Inderal  
 Sotacor  
 sotalol  
 Apo-Timol  
 AZD6140 or placebo 90 mg TAB  
 Plavix  
 clopidogrel or placebo study  
 Plavix  
 clopidogrel or placebo  
 Triton TIMI-38 study  
 dipyridamole  
 Apo-Dipyridamole  
 Novo-Dipiradol  
 Persantine  
 Novo-Ticlopidine  
 amiloride  
 Midamor  
 Novo-Spiroton  
 spironolactone  
 ASA Suppositories  
 Novasen  
 ASA  
 Aspirin  
 Asaphen EC  
 Asaphen  
 Apo-Diflunisal  
 Celexa

SSRI antidepressants  
 SSRI antidepressants  
 SSRI antidepressants  
 SSRI antidepressants  
 SSRI antidepressants

**sterile irrigating solutions**

sterile irrigating solutions  
 sterile irrigating solutions  
 sterile irrigating solutions  
 sterile irrigating solutions

**sulfonamides**

sulfonamides  
 sulfonamides

**thiazide diuretics**

thiazide diuretics  
 thiazide diuretics  
 thiazide diuretics  
 thiazide diuretics  
 thiazide diuretics  
 thiazide diuretics  
 thiazide diuretics

**thiazolidinediones**

thiazolidinediones

**tricyclic antidepressants**

tricyclic antidepressants  
 tricyclic antidepressants  
 tricyclic antidepressants  
 tricyclic antidepressants  
 tricyclic antidepressants  
 tricyclic antidepressants  
 tricyclic antidepressants

fluoxetine  
 fluoxetine  
 fluvoxamine  
 paroxetine  
 paroxetine CR  
 sertraline  
 sterile water  
 sterile water  
 sterile water  
 sterile water  
 sterile water qs SYRINGE  
 sulfasalazine EC  
 sulfasalazine  
 gliclazide MR  
 chlorthalidone  
 hydrochlorothiazide  
 hydrochlorothiazide  
 hydrochlorothiazide  
 hydrochlorothiazide  
 indapamide  
 indapamide  
 metolazone  
 pioglitazone  
 rosiglitazone  
 amitriptyline  
 clomipramine  
 clomipramine  
 desipramine  
 desipramine  
 desipramine  
 imipramine  
 imipramine

Apo-Fluoxetine  
 Prozac  
 Luvox  
 Paxil  
 Paxil CR  
 Novo-Sertaline  
 Bacteriostatic Water For Injection - 30 mL  
 Sterile Water for Irrigation  
 Sterile Water for Injection - 1 L  
 Sterile Water for Injection - 10 mL  
 Sterile Water for Injection  
 PMS Sulfasalazine-E C  
 PMS Sulfasalazine  
 Diamicon MR  
 Novo-Thalidone  
 hydrochlorothiazide  
 PMS-Hydrochlorothiazide  
 Novo-Hydrazide  
 Apo-Hydro  
 Indapamide  
 Gen-Indapamide  
 Zaroxolyn  
 Actos  
 Avandia  
 Novo-Triptyn  
 Gen-Clomipramine  
 Apo-Clomipramine  
 PMS Desipramine  
 Apo-Desipramine  
 Ratio-Desipramine Hydrochloride  
 Apo-Imipramine  
 imipramine

vitamins

vitamin E

# Aquasol E

vitamins

vitamin E

Novo-E (D-Natural)

Copyright © CACR
